# Supplementary material
Source: PubMed Central journal article supplement (PMC6402971)
Supplement: NIHMS1517070-supplement-125_2018_4786_MOESM1_ESM.pdf [file NIHMS1517070-supplement-125_2018_4786_MOESM1_ESM.pdf]

**ESM Table 1.** Flow cytometry panel for T cell phenotyping

| <b>Marker</b> | <b>Fluorochrome</b> | <b>Clone</b> | <b>Supplier*</b> |
|---------------|---------------------|--------------|------------------|
| CD56          | BUV 395             | NCAM16.2     | BD               |
| CD45RA        | BUV 737             | HI100        | BD               |
| GrzmB         | BV421               | GB11         | BD               |
| CCR7          | BV510               | G043H7       | BL               |
| CD3           | ev605               | OKT3         | eBio             |
| PD1           | ev655               | J105         | eBio             |
| CD127         | BV711               | A019D5       | BL               |
| CD45R0        | BV786               | UCHL1        | BD               |
| CD4           | BB515               | RPA-T4       | BD               |
| Eomes         | PE                  | WD1928       | eBio             |
| FoxP3         | PE-CF594            | 259D         | BD               |
| KLRG1         | PE-vio770           | REA261       | Miltenyi         |
| TIGIT         | APC                 | MBSA43       | eBio             |
| CD8           | AF700               | RPA-T8       | BL               |
| CD57          | APC-vio770          | TB03         | Miltenyi         |

\*BD Biosciences: San Jose, CA, USA. BioLegend: San Diego, CA, USA.  
eBiosciences: San Diego, CA, USA. Miltenyi: Auburn, CA, USA.

**ESM Table 2.** Characteristics of study participants at study enrollment

|                                           | <b>Control group<br/>(n=12)</b> | <b>Drug-treated Non-responders<br/>(n=21)</b> | <b>Drug-treated Responders<br/>(n=10)</b> | <b>p value</b> |
|-------------------------------------------|---------------------------------|-----------------------------------------------|-------------------------------------------|----------------|
| Age at baseline (years)                   | 12.27+/-0.86                    | 12.20+/-0.75                                  | 11.39+/-0.84                              | 0.77           |
| Duration of diabetes at enrollment (days) | 37.33+/-2.86                    | 38.48+/-1.93                                  | 41.80+/-2.06                              | 0.47           |
| Male (%)                                  | 66.7%                           | 61.9%                                         | 50%                                       | 0.72           |
| White (%)                                 | 100%                            | 85.7%                                         | 90%                                       | 0.40           |
| Minority (%)                              | 0%                              | 9.5%                                          | 10%                                       | 0.54           |
| BMI (kg/m <sup>2</sup> )                  | 19.60+/-0.78                    | 18.56+/-0.73                                  | 19.64+/-1.11                              | 0.56           |
| Insulin use (units/kg/day)                | 0.40+/-0.04                     | 0.39+/-0.06                                   | 0.29+/-0.09                               | 0.50           |
| HbA <sub>1c</sub> (mmol/mol)              | 60.15+/-4.56                    | 59.87+/-2.56                                  | 52.78+/-2.96                              | 0.28           |
| HbA <sub>1c</sub> (%)                     | 7.66+/-0.42                     | 7.63+/-0.23                                   | 6.98+/-0.27                               | 0.28           |
| C-peptide AUC (nmol/l)                    | 0.50+/-0.05                     | 0.49+/-0.03                                   | 0.57+/-0.07                               | 0.43           |

**ESM Table 3. Safety data.** At the time of the follow-up visit the participants were queried about significant adverse events occurring since the study period was over. The Table shows the number of individuals (%) with the indicated adverse events (n=12 control, 21 drug-treated non-responders, 10= drug-treated responder). Adverse events were graded as per the original AbATE [9] and only grade 2 and above adverse events are shown. The adverse events were all considered unrelated or unlikely related to study drug.

| <b>Term</b>             | <b>Control (%)</b> | <b>Drug treated Non-responder (%)</b>  | <b>Drug treated Responder (%)</b> |
|-------------------------|--------------------|----------------------------------------|-----------------------------------|
| Severe hypoglycemia     | 2(18%)             | 6(28.6%)                               | 1 (10%)                           |
| Diabetic ketoacidosis   | 1 (8.3%)           | 1 (4.8%)                               | 1 (10%)                           |
| Acquired hypothyroidism | 2 (16.7%)          |                                        | 1 (10%)                           |
| Other                   |                    | Neuropathic syndrome treated with IVIG |                                   |

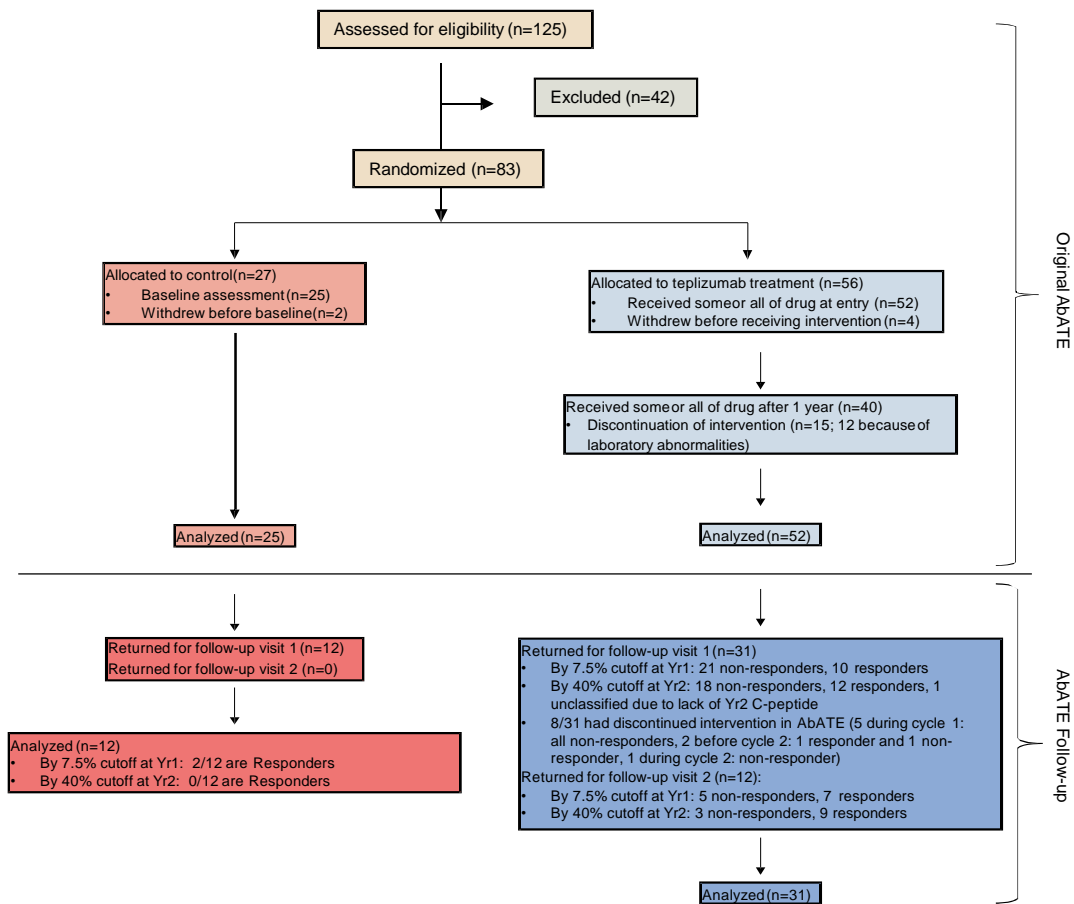

**ESM Fig. 1. Enrollment, randomization, and participation in the original AbATE study and follow-up.** The original randomization and participation were described previously [9]. Of the 83 individuals initially randomized, 77 were included in the AbATE ITT analysis, 25 in the control group and 52 in the treated group. A total of 15 patients discontinued the intervention in the original AbATE, 6 during cycle 1, 6 prior to initiation of cycle 2, and 3 during cycle 3. Of the 77 individuals that participated in AbATE, 43 were analyzed for follow-up. Thirty-one drug-treated participants returned for follow-up, including 21 drug-treated non-responders and 10 drug-treated responders. Eight of the follow-up participants had discontinued therapy during AbATE, 5 during cycle 1 (all drug-treated non-responders), 2 prior to starting cycle 2 (a responder and a non-responder) and 1 during cycle 2 (a non-responder). By the original AbATE criteria (<40% decline in C-peptide at Yr2), the individuals who followed up were classified as 18 drug-treated non-responders, 12 drug-treated responders and 1 unclassified due to lack of C-peptide at Yr2. Twelve treated participants returned for follow-up visit 2, 5 drug-treated non-responders and 7 drug-treated responders (3 drug-treated non-responders and 9 drug-treated responders by the original AbATE criteria). Twelve control individuals were analyzed for follow-up. All of the control participants were drug-treated non-responders per the original response criteria and 2 were drug-treated responders by the current criteria. None of the controls returned for follow-up visit 2.

**a. Treg, anergic and exhausted CD4 and CD8 (shown for CD4)**

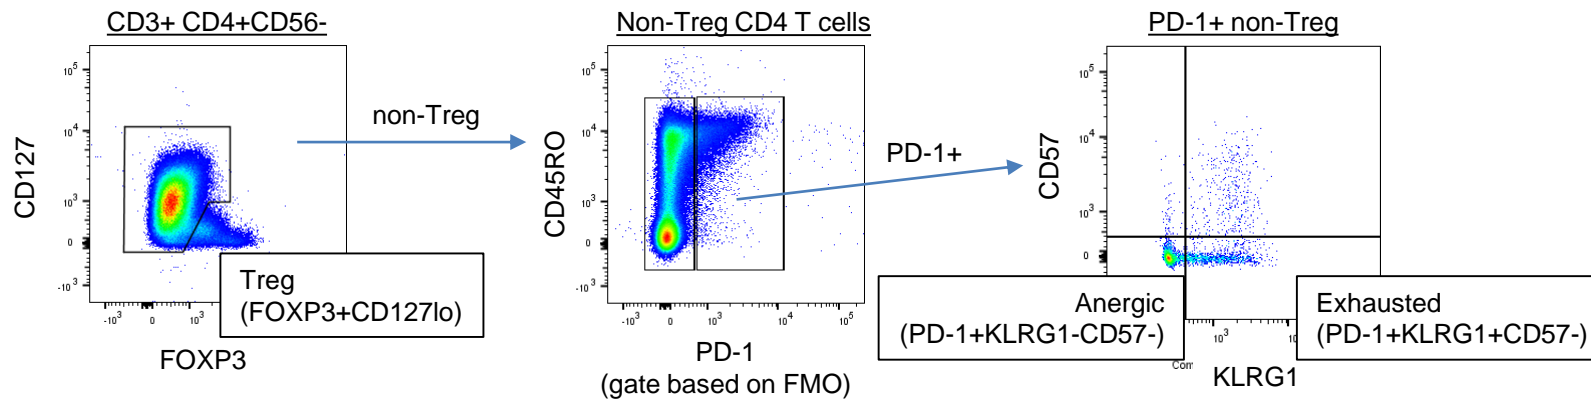

**b. PD-1 on central memory CD8**

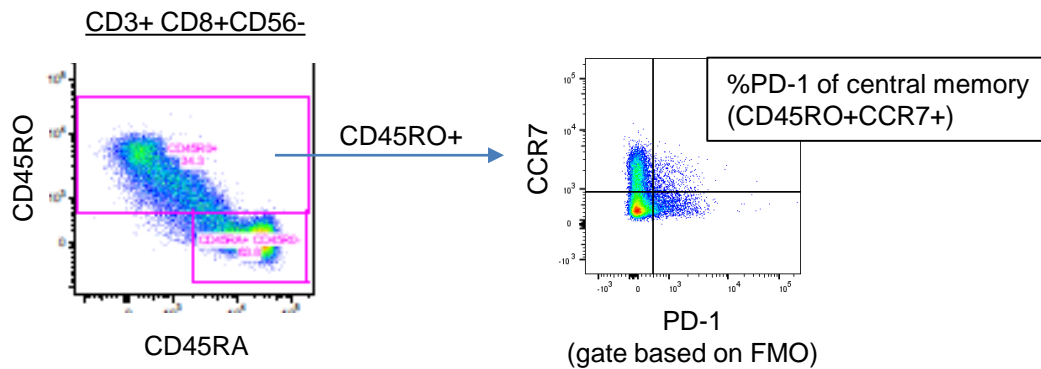

**ESM Fig. 2. Representative electronic gating for T cell subsets.** (a) Forward and side scatter gates were placed around lymphocytes. On CD3+Foxp3- cells, gates were placed on PD-1+CD45RO+ cells. These were further identified on the basis of KLRG1 and CD57 staining as anergic (PD-1+CD57-KLRG1- or exhausted PD-1+KLRG1+CD57-). (b) Central memory cells were identified as CD45RO+CCR7+.

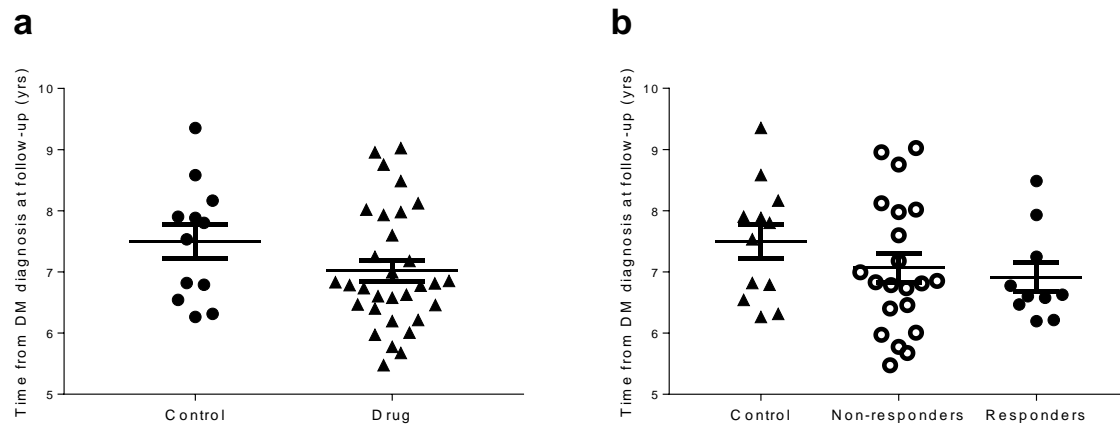

**ESM Fig. 3.** Time from diabetes diagnosis to follow-up. The time from diabetes diagnosis to follow-up was similar between **(a)** controls and treated participants ( $7.50 \pm 0.28$  and  $7.02 \pm 0.17$  respectively, difference not statistically significant by Student's t test) and **(b)** response groups ( $7.50 \pm 0.28$  for controls,  $7.07 \pm 0.23$  for drug-treated non-responders,  $6.91 \pm 0.24$  for drug-treated responders, difference not statistically significant by one-way ANOVA). (mean  $\pm$  SEM)

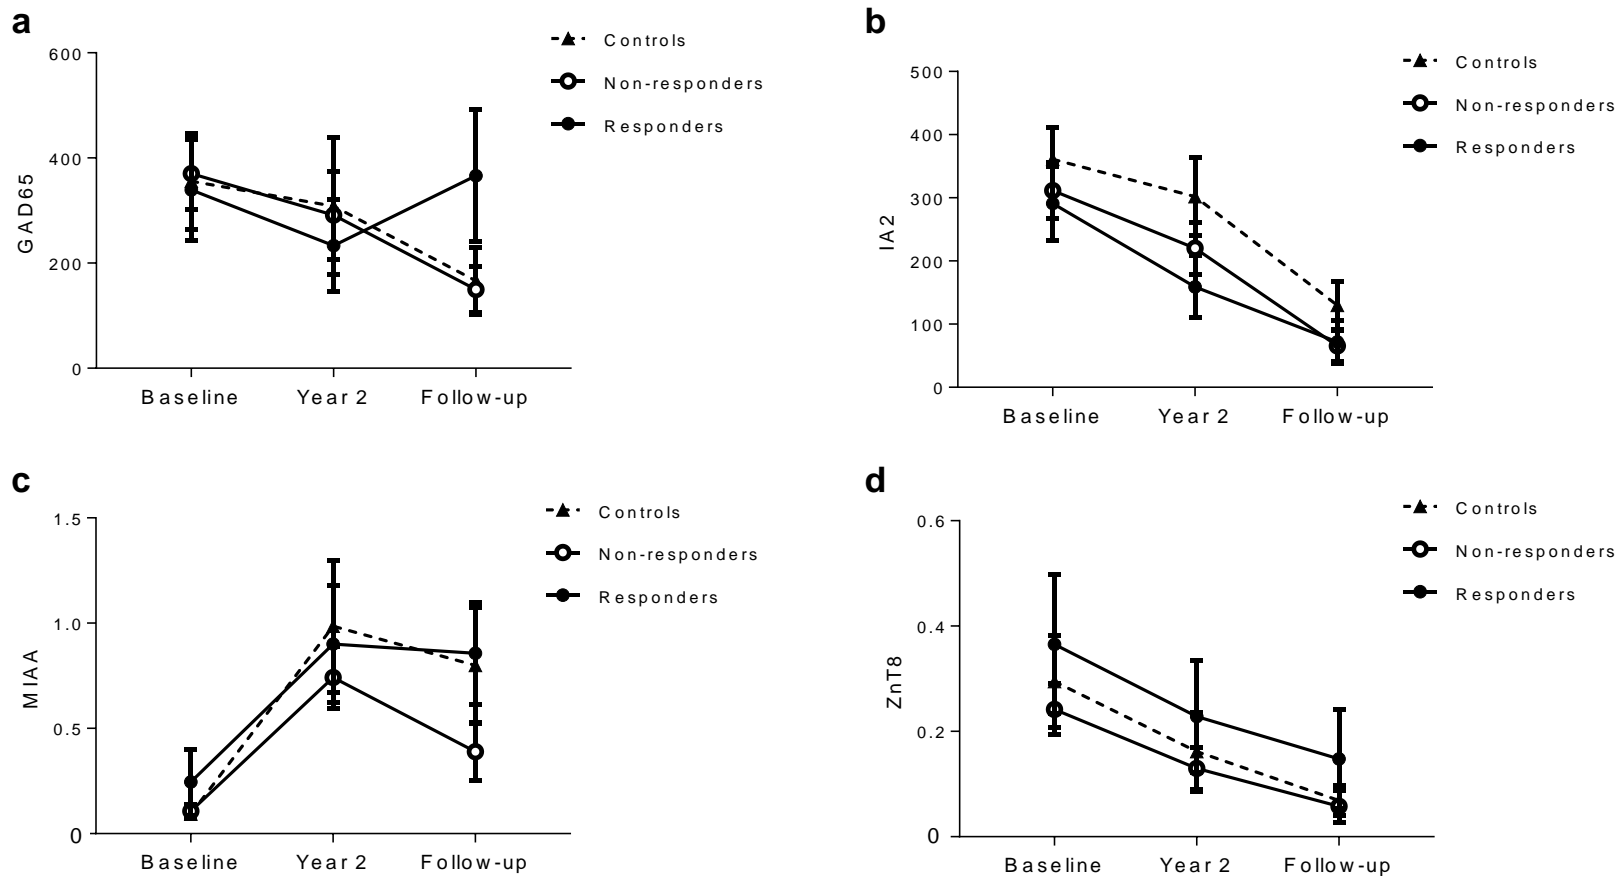

**ESM Fig. 4. Changes in autoantibody titers over time and between groups.** Autoantibody titers are shown at baseline, 2 years, and follow-up for controls and response groups. **(a)** GAD65 autoantibody **(b)** IA-2 autoantibody **(c)** MIAA autoantibody **(d)** ZnT8 autoantibody. There was a significant decline in anti-ZnT8 ( $p < 0.01$ , two-way ANOVA) and anti-IA-2 ( $p < 0.001$ , two-way ANOVA) and a significant increase in MIAA ( $p < 0.001$ , two-way ANOVA) over time. The anti-GAD65 titers did not change significantly. There were no overall differences between groups. (mean  $\pm$  SEM)
